# Supplementary material for: Synergetic nanoporous Mn–Ru oxides as efficient electrocatalysts for the oxygen reduction reaction
Source: Royal Society of Chemistry journal article supplement (doi:10.1039/c7nj01408b), 2017-01-01
Supplement: c7nj01408b1.pdf [file c7nj01408b1.pdf]

# Synergetic Nanoporous Mn-Ru Oxides as Efficient Electrocatalysts for Oxygen Reduction Reaction

Mohamed B. Zakaria,<sup>1,2\*</sup> and Toyohiro Chikyow<sup>1\*</sup>

- 1 International Center for Materials Nanoarchitectonics (MANA), National Institute for Materials Science (NIMS), 1-1 Namiki, Tsukuba, Ibaraki 305-0044, Japan.
- 2 Department of Chemistry, Faculty of Science, Tanta University, Tanta, Gharbeya 31527, Egypt.

E-mails: [chikyo.toyohiro@nims.go.jp](mailto:chikyo.toyohiro@nims.go.jp)  
[mohamed.barakat@nims.go.jp](mailto:mohamed.barakat@nims.go.jp)

**Figure S1**

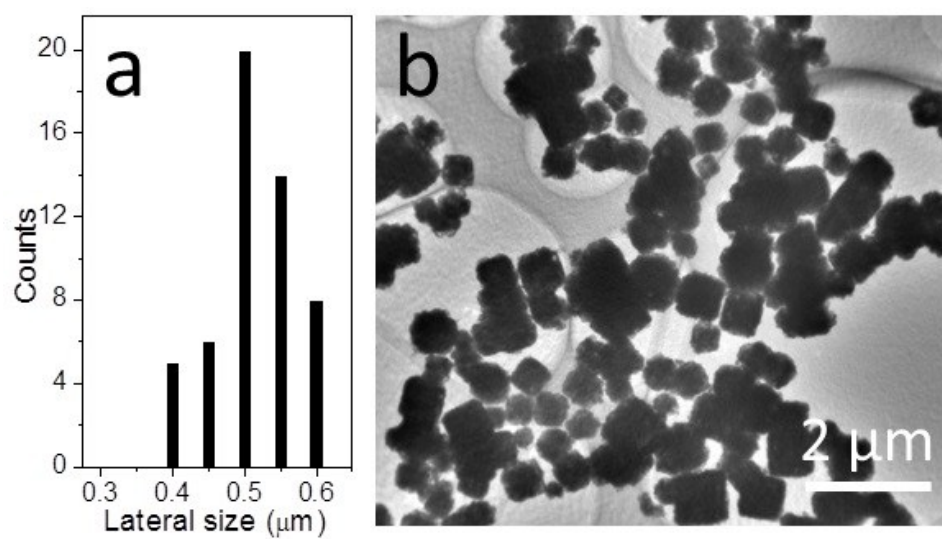

**Figure S1** a) The estimated lateral size of the as-prepared Mn-Ru CP nanocubes, and b) the corresponding TEM image.

**Figure S2**

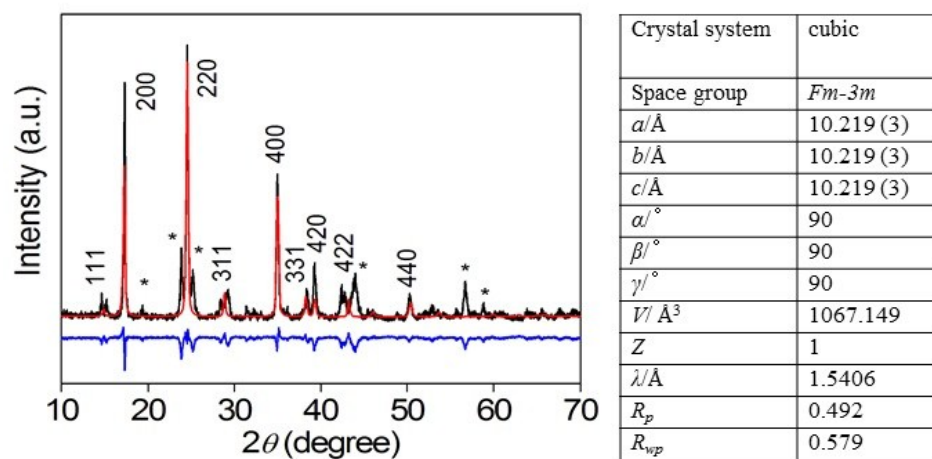

**Figure S2** Experimental XRD patterns (black line), computed XRD patterns (red line), and the residuals (blue line) of the as-prepared Mn-Ru CP nanocubes. The peaks indicated by (\*) are generated from impurities.

**Figure S3**

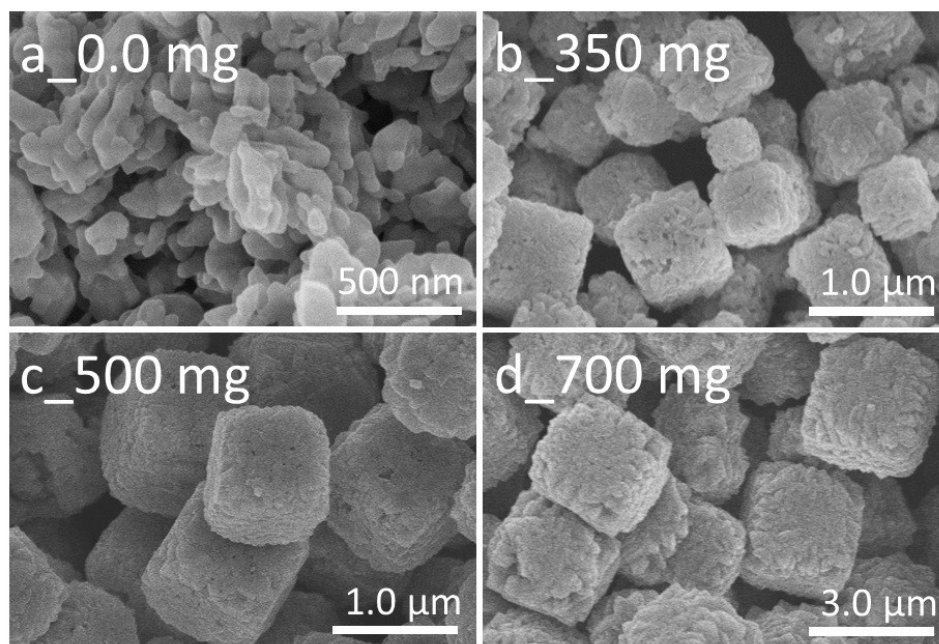

**Figure S3** SEM images of the as-prepared Mn-Ru CP using various amounts of TSCD.

**Figure S4**

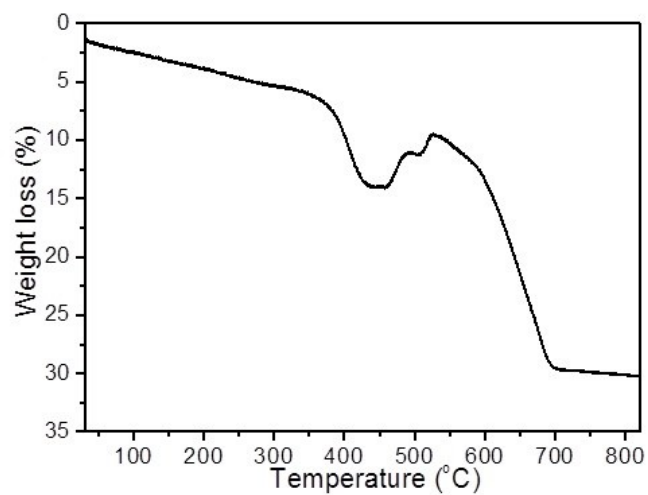

**Figure S4** TG curve of the as-prepared Mn-Ru CP nanocubes at a heating rate of 5 °C min<sup>-1</sup> from room temperature to around 800 °C.

**Figure S5**

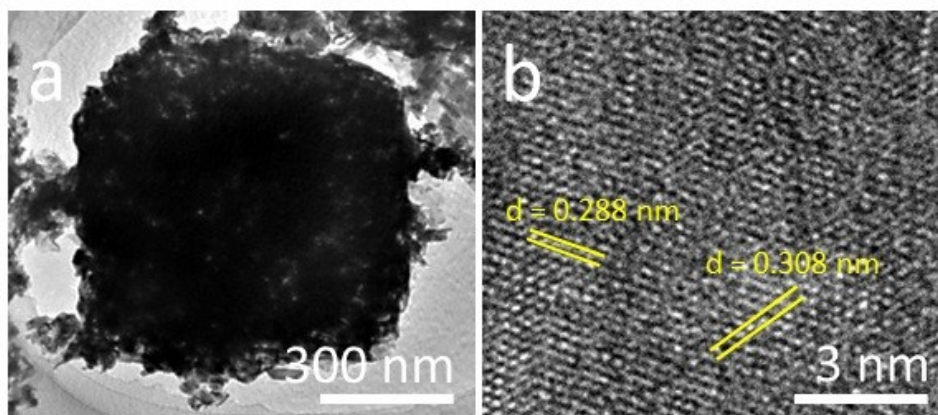

**Figure S5** a) TEM image of one cube of the thermally derived nanoporous Mn-Ru oxide and b) the corresponding HRTEM of a selected area.

**Figure S6**

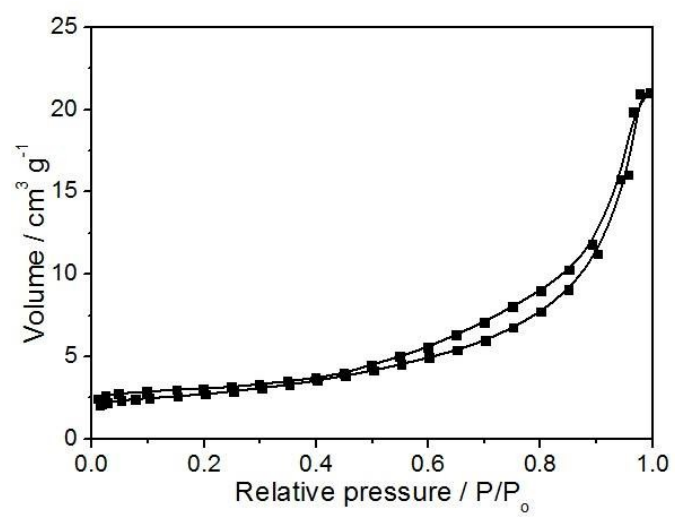

**Figure S6** Nitrogen gas adsorption-desorption isotherms of the nanoporous Mn-Ru oxide.

**Figure S7**

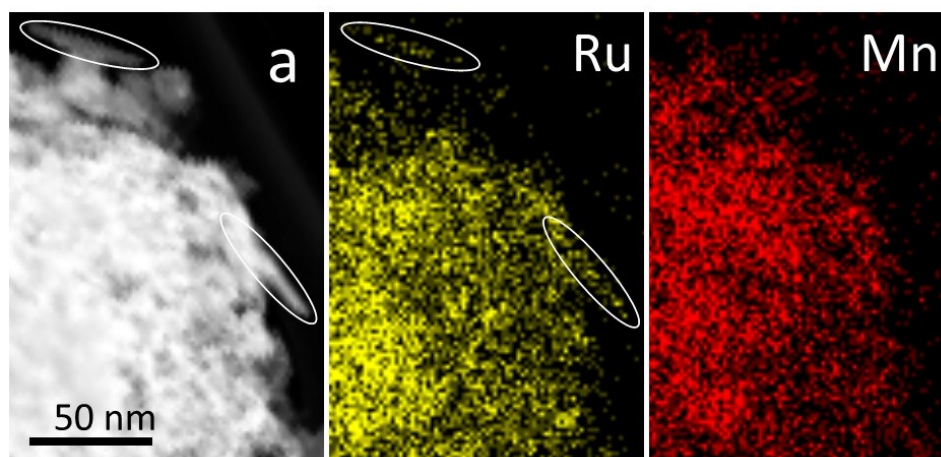

**Figure S7 b)** High-resolution HAADF-STEM image and the corresponding elemental mapping (Ru and Mn atoms) of the thermally derived nanoporous Mn-Ru oxide.

**Figure S8**

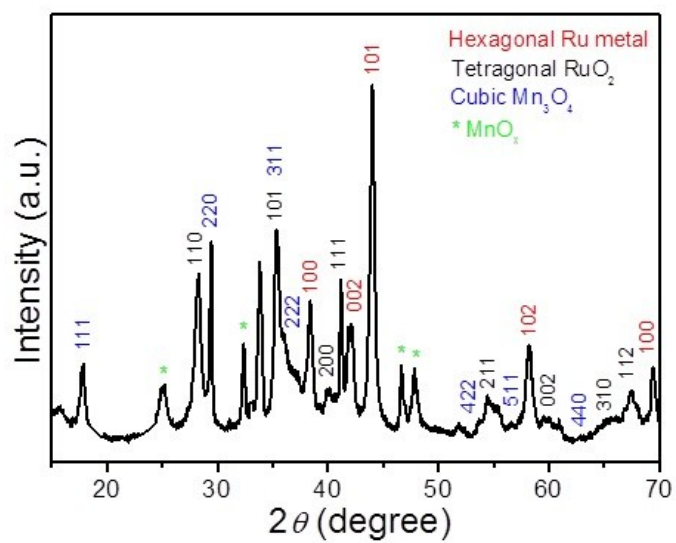

**Figure S8** Wide-angle XRD patterns of the thermally derived nanoporous Mn-Ru oxide.

**Figure S9**

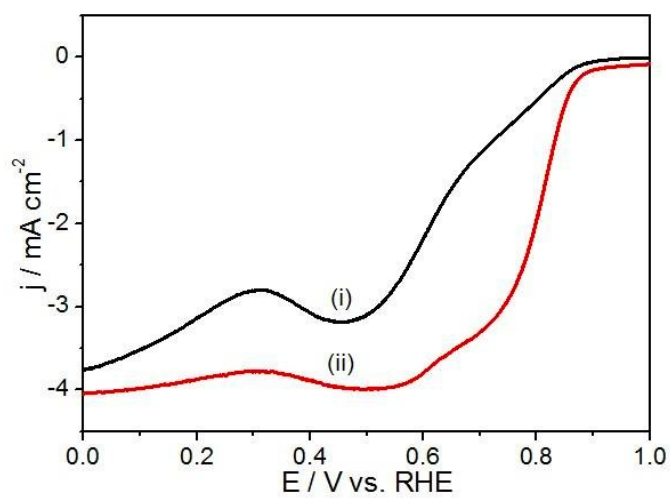

**Figure S9** ORR polarization curves of (i) physically mixed Mn-Ru oxides and (ii) nanoporous Mn-Ru oxide recorded in  $\text{O}_2$ -saturated 0.1 M KOH solution with a sweep rate of  $10 \text{ mV s}^{-1}$  at a rotation rate of 1600 rpm.
